# Supplementary material
Source: MDPI journal article supplement (https://www.mdpi.com/1424-2818/16/4/192)
Supplement: s1 [file s1]

Table S3: GenBank accession numbers for *Bartonella* sp. from Lithuanian bat fleas.

| Host species                 | Isolate | Flea |                                 | RT-PCR | Accession numbers  |             |              |             |
|------------------------------|---------|------|---------------------------------|--------|--------------------|-------------|--------------|-------------|
|                              |         | sex  | species                         |        | <i>16S-23S ITS</i> | <i>rpoB</i> | <i>groEL</i> | <i>gltA</i> |
| <i>Pipistrellus nathusii</i> | PS16    | M    | <i>Ischnopsyllus variabilis</i> | +      | PP296528           | PP333854    | PP333876     | PP333838    |
| <i>Pipistrellus nathusii</i> | PS17    | M    | <i>Ischnopsyllus variabilis</i> | +      | PP296529           | PP333855    | PP333877     | PP333839    |
| <i>Pipistrellus nathusii</i> | PS18    | M    | <i>Ischnopsyllus variabilis</i> | +      | PP296530           | PP333856    | PP333878     | PP333840    |
| <i>Pipistrellus nathusii</i> | PS19    | V    | <i>Ischnopsyllus simplex</i>    | +      | PP296531           | -           | -            | -           |
| <i>Pipistrellus nathusii</i> | PS20    | M    | <i>Ischnopsyllus variabilis</i> | +      | PP296532           | PP333857    | PP333879     | +           |
| <i>Pipistrellus nathusii</i> | PS22    | M    | <i>Ischnopsyllus variabilis</i> | +      | PP296533           | PP333858    | PP333880     | PP333841    |
| <i>Pipistrellus pygmaeus</i> | PS24    | M    | <i>Ischnopsyllus octactenus</i> | +      | PP296534           | PP333859    | PP333881     | PP333842    |
| <i>Pipistrellus pygmaeus</i> | PS25    | M    | <i>Ischnopsyllus octactenus</i> | +      | PP296535           | PP333860    | PP333882     | PP333843    |
|                              | PS26    | M    | <i>Ischnopsyllus octactenus</i> | +      | PP296536           | PP333861    | PP333883     | PP333844    |
| <i>Nyctalus noctula</i>      | PS27    | V    | <i>Ischnopsyllus elongatus</i>  | +      | PP296537           | PP333862    | PP333884     | PP333845    |
|                              | PS28    | M    | <i>Ischnopsyllus elongatus</i>  | +      | -                  | PP333863    | PP333885     | -           |
|                              | PS29    | M    | <i>Ischnopsyllus elongatus</i>  | -      | PP296538           | PP333864    | PP333886     | PP333846    |
| <i>Pipistrellus nathusii</i> | PS31    | M    | <i>Ischnopsyllus octactenus</i> | +      | +                  | +           | +            | +           |
| <i>Pipistrellus nathusii</i> | PS32    | M    | <i>Ischnopsyllus variabilis</i> | +      | PP296539           | PP333865    | PP333887     | PP333847    |
| <i>Pipistrellus nathusii</i> | PS33    | M    | <i>Ischnopsyllus variabilis</i> | +      | PP296540           | PP333867    | PP333888     | PP333848    |
| <i>Pipistrellus nathusii</i> | PS34    | M    | <i>Ischnopsyllus octactenus</i> | +      | PP296541           | PP333868    | PP333889     | PP333849    |
| <i>Pipistrellus nathusii</i> | PS35    | M    | <i>Ischnopsyllus variabilis</i> | +      | PP296542           | PP333869    | +            | PP333850    |
| <i>Pipistrellus nathusii</i> | PS36    | V    | <i>Ischnopsyllus variabilis</i> | +      | PP296543           | PP333870    | PP333890     | PP333851    |
| <i>Pipistrellus nathusii</i> | PS37    | M    | <i>Ischnopsyllus variabilis</i> | +      | PP296544           | PP333871    | PP333891     | PP333852    |
| <i>Pipistrellus nathusii</i> | PS38    | M    | <i>Ischnopsyllus variabilis</i> | +      | PP296545           | PP333872    | PP333892     | +           |
| <i>Pipistrellus nathusii</i> | PS41    | M    | <i>Ischnopsyllus octactenus</i> | +      | PP296546           | PP333873    | PP333893     | -           |
| <i>Pipistrellus nathusii</i> | PS42    | M    | <i>Ischnopsyllus variabilis</i> | +      | PP296547           | PP333874    | PP333894     | -           |
| <i>Pipistrellus nathusii</i> | PS43    | V    | <i>Ischnopsyllus variabilis</i> | +      | PP296548           | PP333875    | PP333895     | PP333853    |

Positive samples with unsuccessful sequencing are marked by +; Negative amplification is marked by -.
