# Supplementary material
Source: MDPI journal article supplement (https://www.mdpi.com/1424-2818/16/4/192)
Supplement: s1 [file s1]

Archive with 5 entries (5 files):
- Figures S1-S7.pdf
- Table S3.pdf
- Table_S1.pdf
- Table_S2.pdf
- Table_S4.pdf
