# Supplementary material
Source: MDPI journal article supplement (https://www.mdpi.com/1424-2818/16/4/192)
Supplement: s1 [file s1 › Figures S1-S7.pdf]

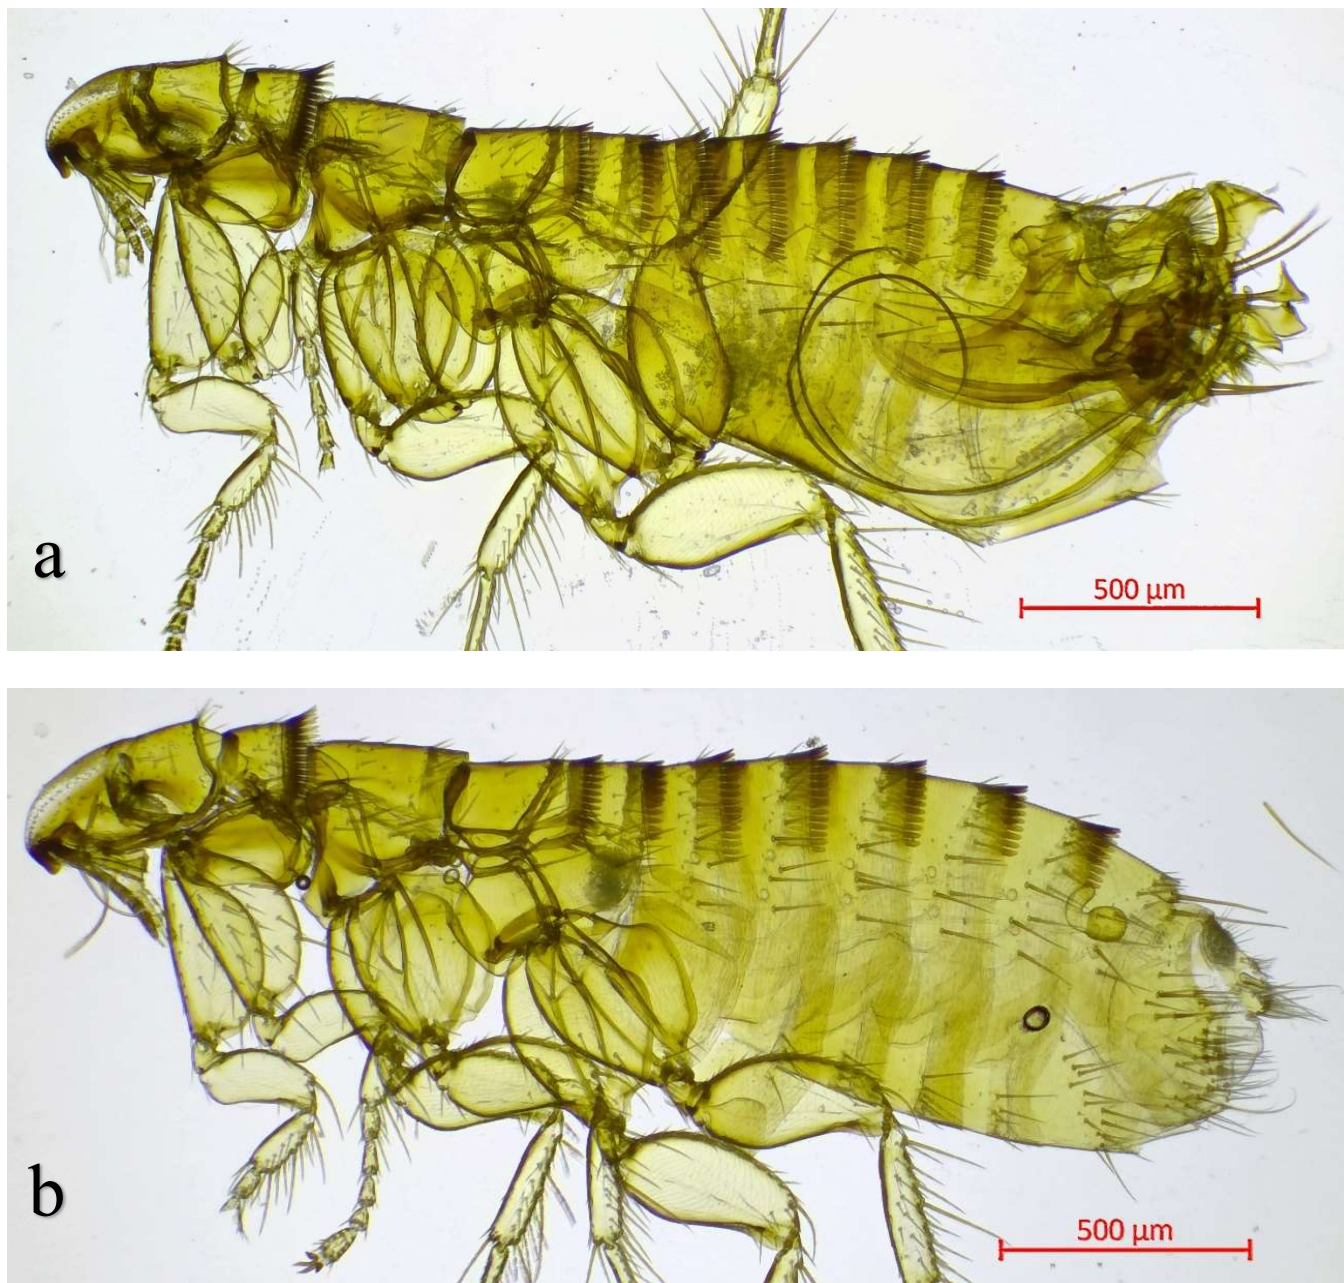

**Figure S1.** *Ischnopsyllus variabilis* general view of male (a) and female (b).

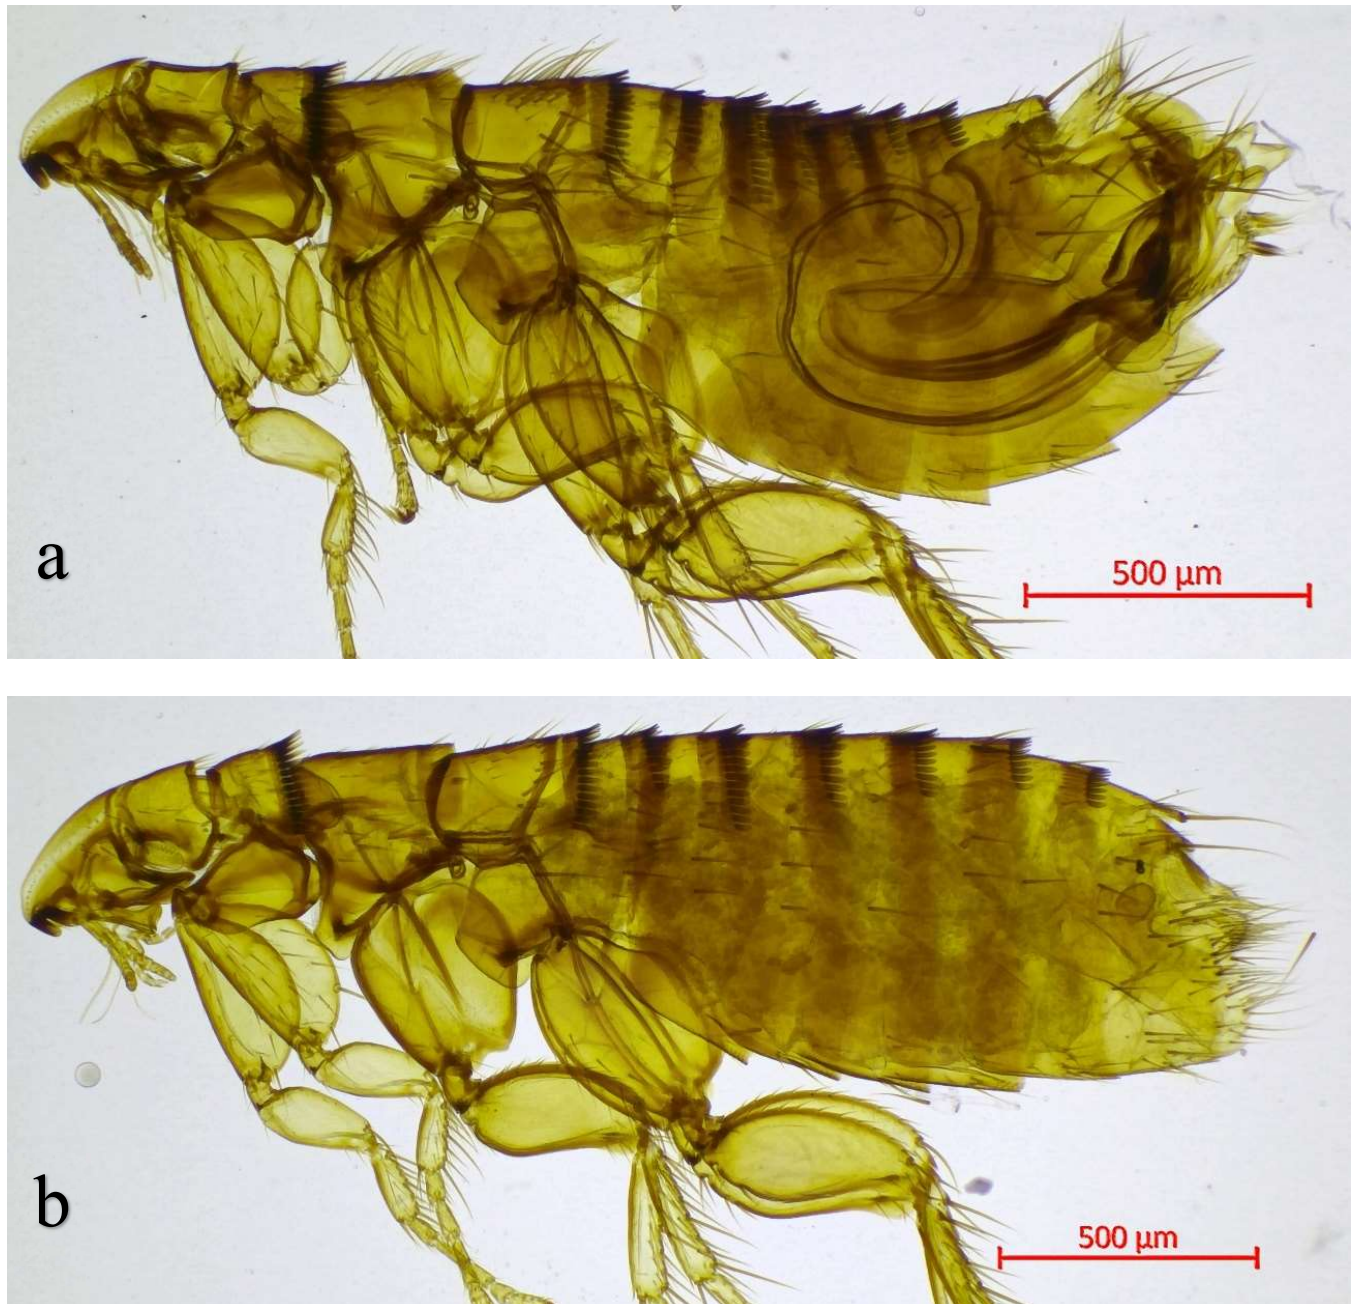

**Figure S2.** *Ischnopsyllus octactenus* general view of male (a) and female (b).

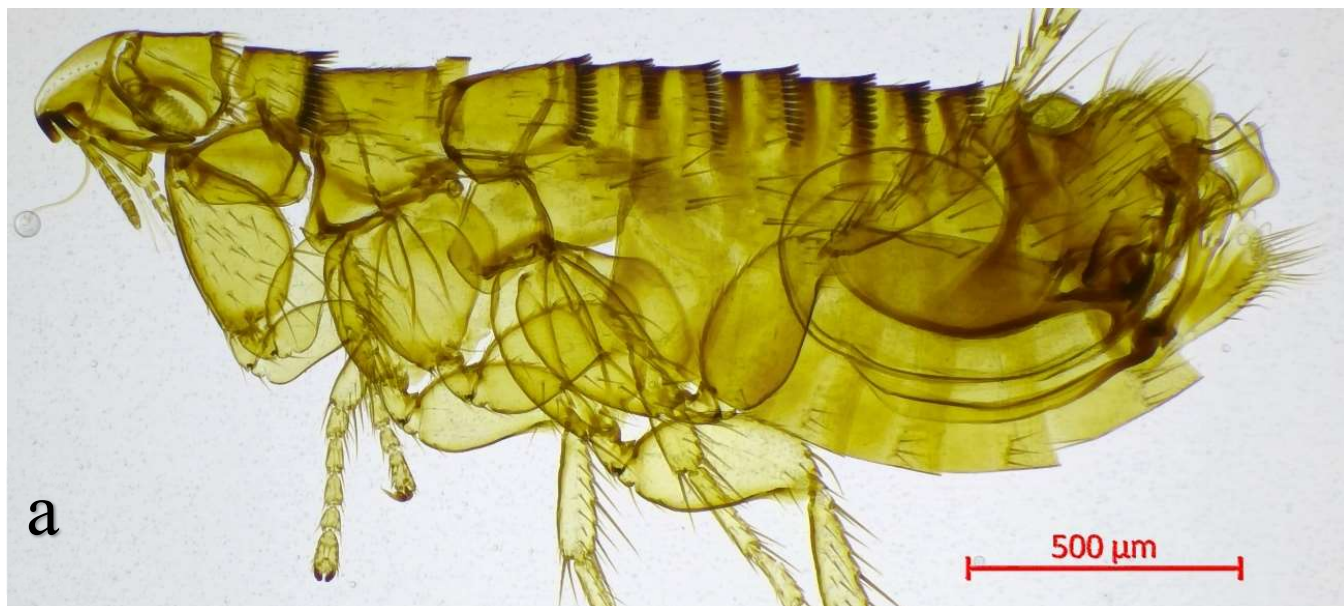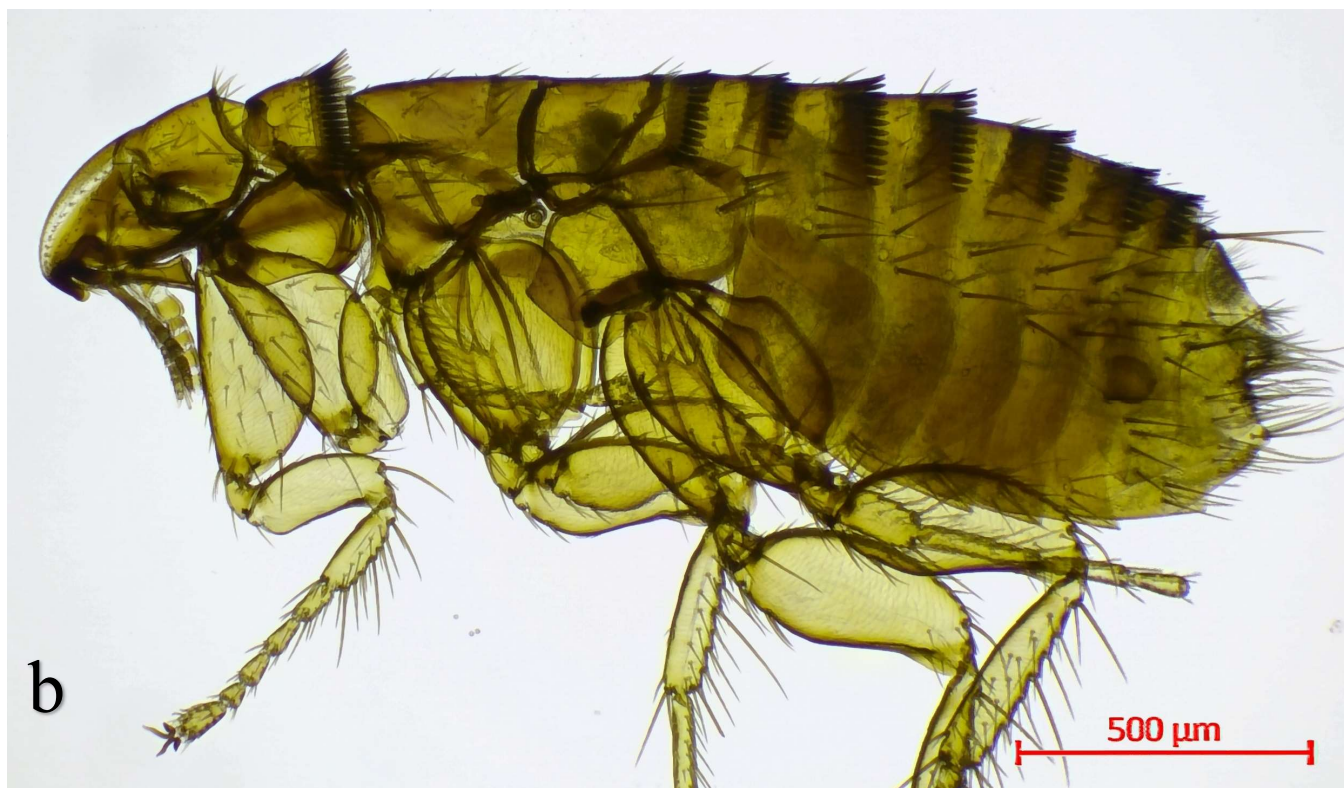

**Figure S3.** *Ischnopsyllus simplex* general view of male (a) and female (b).

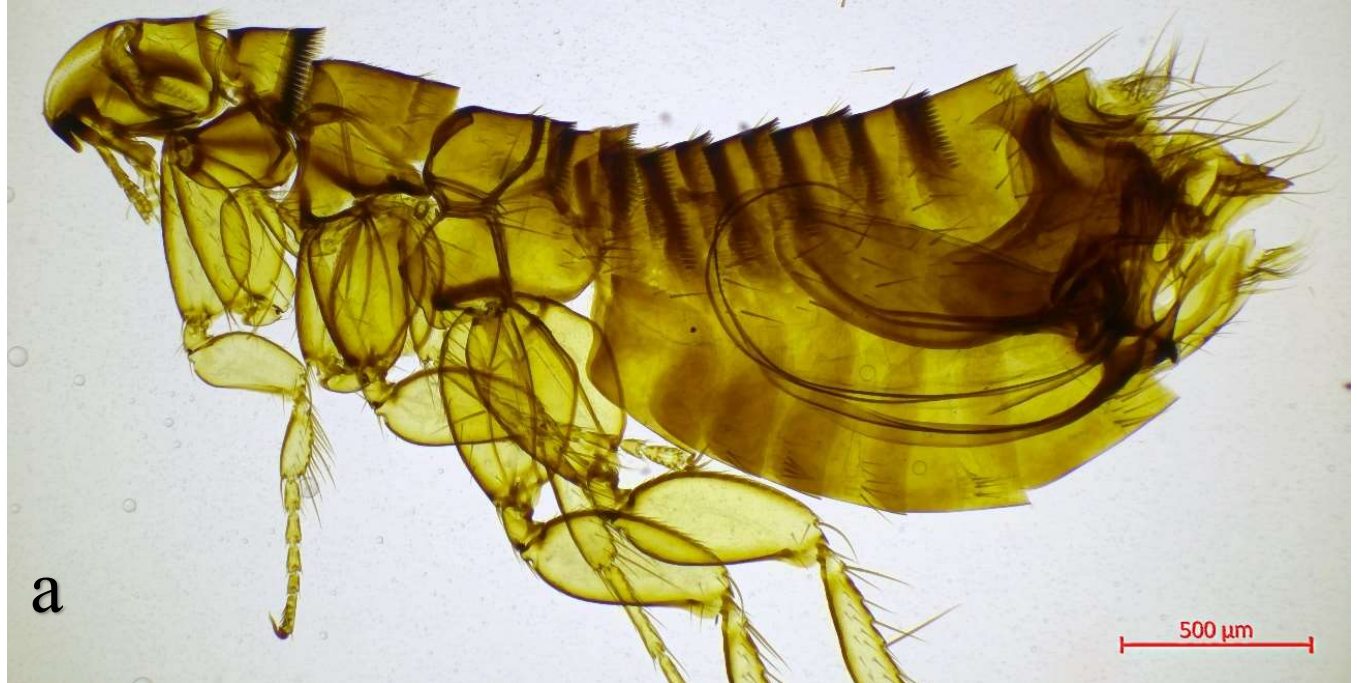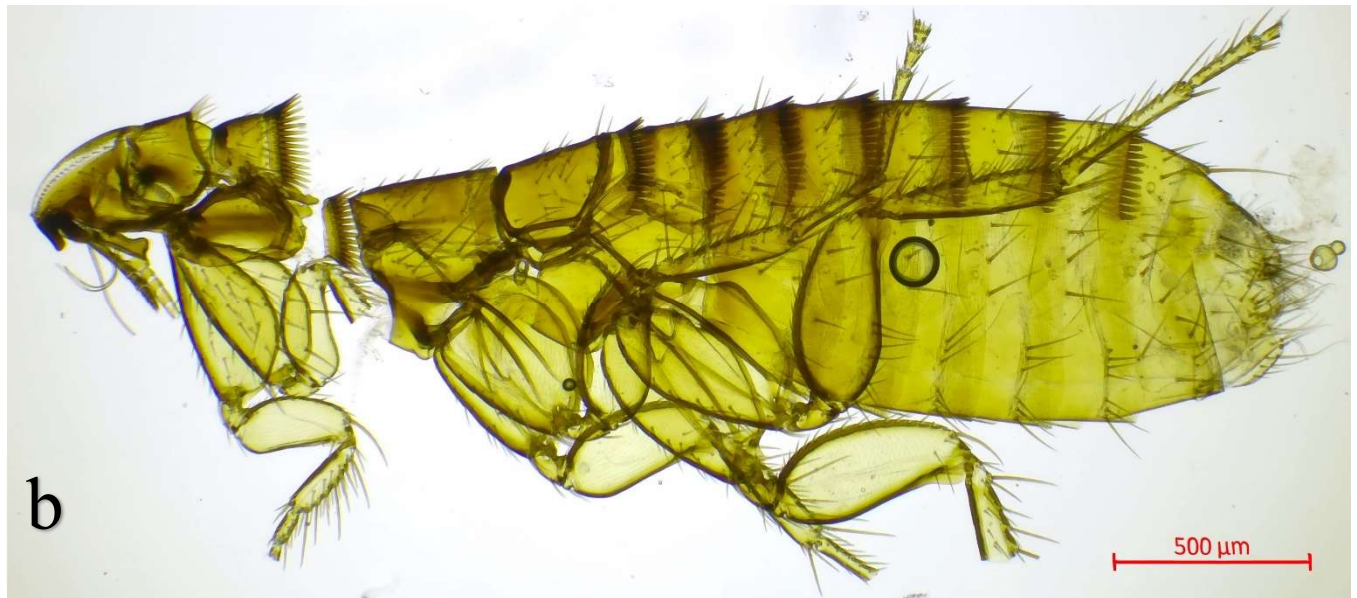

**Figure S4.** *Ischnopsyllus elongatus* general view of male (a) and female (b).

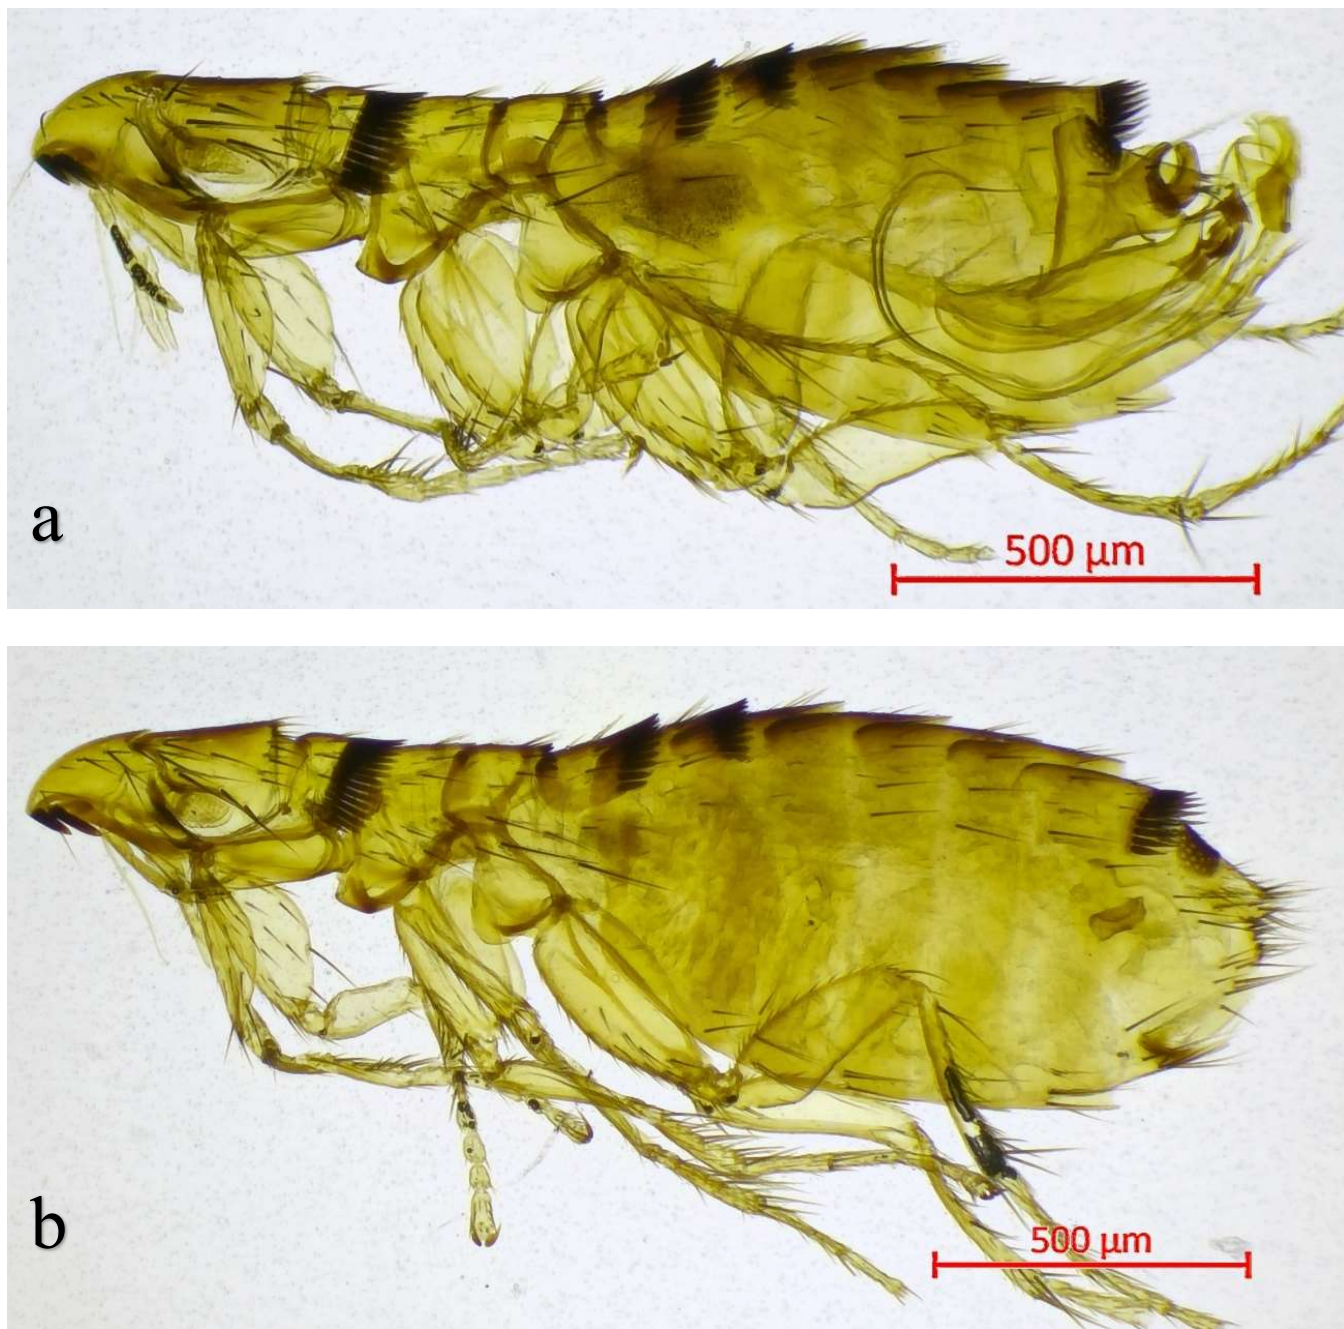

**Figure S5.** *Nycteridopsylla pentactena* general view of male (a) and female (b).

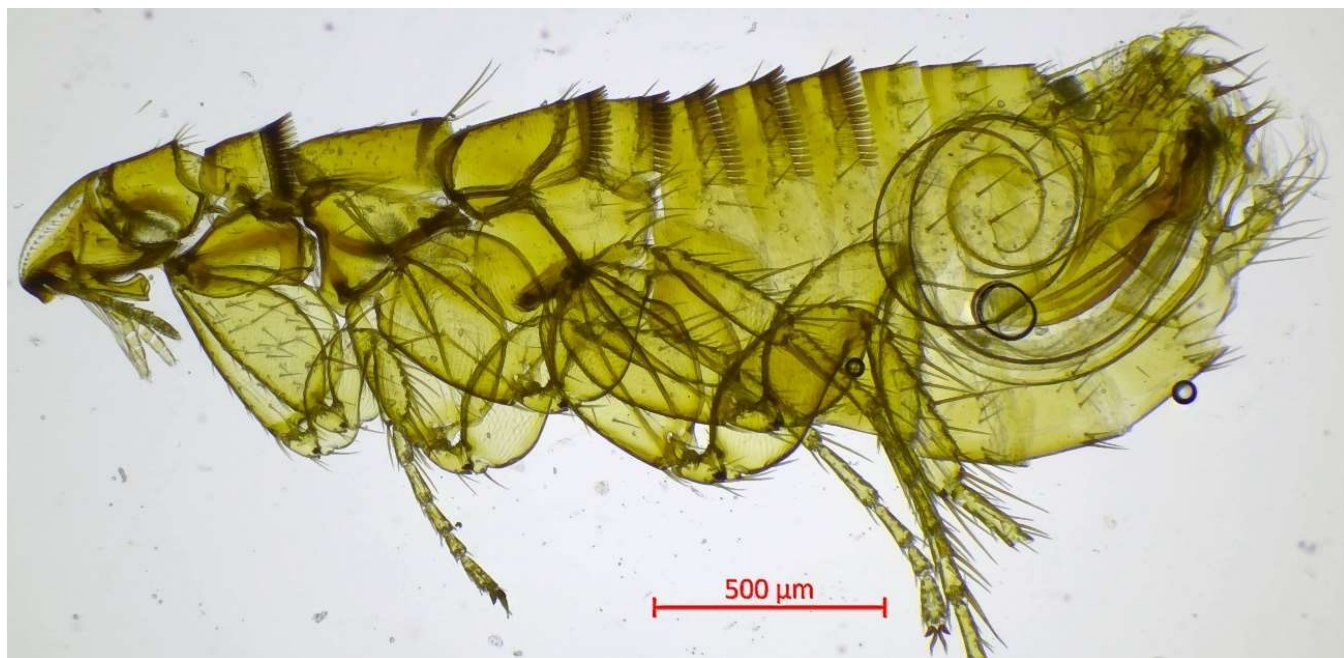

**Figure S6.** *Ischnopsyllus hexactenus* general view of male.

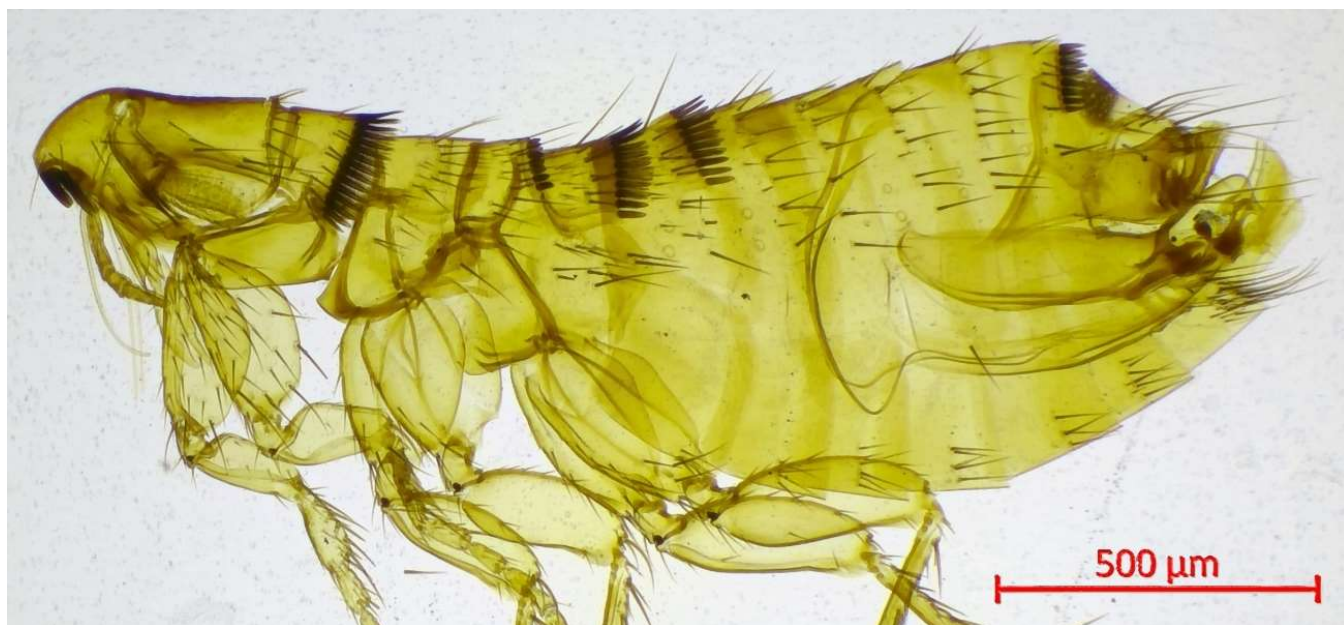

**Figure S7.** *Nycteridopsylla eusarca* general view of male.
