# Supplementary material
Source: MDPI journal article supplement (https://www.mdpi.com/1424-2818/16/4/192)
Supplement: s1 [file s1 › Table_S1.pdf]

Table S1: PCR target genes and primers were used in this study.

| Target gene                    | Reaction      | Oligonucleotide sequences (5'-3')                                                                                                                           | Amplified fragment, bp | Reference                                     |
|--------------------------------|---------------|-------------------------------------------------------------------------------------------------------------------------------------------------------------|------------------------|-----------------------------------------------|
| <b><i>Anaplasma</i> spp.</b>   |               |                                                                                                                                                             |                        |                                               |
| <i>msp2</i>                    | Real time PCR | Anaplasma_F GGACAACATGCTTGTAGCTATGGAAGG<br>Anaplasma_R CCTTGGTCTTGAAGCGCTCGTA<br>Anaplasma_Zr TCTCAAGCTCAACCCTGGCACCACCA VIC/BHQ1                           | 98                     | Ražanskė et al., 2019                         |
| <i>msp4</i>                    | Nested PCR    | MAP4AP5 ATGAATTACAGAGAATTGCTTGTAGG<br>MSP4AP3 TTAATTGAAAGCAAATCTTGCTCCTATG                                                                                  | 849                    | de la Fuente et al., 2005                     |
|                                |               | msp4f CTATTGGYGGNGCYAGAGT<br>msp4r GTTCATCGAAAATTCCGTGGTA                                                                                                   | 380                    | Bown et al., 2007                             |
| <i>16S rRNA</i>                | Nested PCR    | ge3a CACATGCAAGTCGAACGGATTATTC<br>ge10r TTCCGTTAAGAAGGATCTAATCTCC                                                                                           | 932                    | Massung et al., 1998                          |
|                                |               | ge9f AACGGATTATTCTTTATAGCTTGCT<br>ge9r GGCAGTATTTAAAGCAGCTCCAGG                                                                                             | 546                    |                                               |
|                                |               |                                                                                                                                                             |                        |                                               |
| <i>groESL</i>                  | Nested PCR    | HS1a AITGGGCTGGTAITGAAAT<br>HS6a CCICCGGIACIAACCTTC                                                                                                         | 1300–1450              | Sumner et al. 1997; Liz et al. 2002           |
|                                |               | HS43 ATWGCWAARGAAGCATAGTC<br>HSVR CTCAACAGCAGCTCTAGTAGC                                                                                                     | ~ 1300                 |                                               |
| <b><i>Babesia</i> spp.</b>     |               |                                                                                                                                                             |                        |                                               |
| <i>18S rRNA</i>                | Real time PCR | Babesia_F3a GACTCCTTCAGCACCTTGAGA<br>Babesia_F3b GACCCCTTCAGGAGCTTGAGA<br>Babesia_R3 CATGCACCACCACCAWAGAATCA<br>Babesia_Z TGACGGAAGGGCACCACCAGGCGT ROX/BHQ2 | 214                    | Ražanskė et al., 2019                         |
| <i>18S rRNA</i>                | Nested PCR    | BS1 GACGGTAGGGTATTGGCCT<br>BS2 ATTCACCGGATCACTCGATC                                                                                                         | 1340                   | Rar et al., 2011                              |
|                                |               | PiroA AATACCCAATCCTGACACAGGG<br>PiroC CCAACAAAATAGAACCAAAGTCCTAC                                                                                            | 340-390                |                                               |
| <b><i>Bartonella</i> spp.</b>  |               |                                                                                                                                                             |                        |                                               |
| <i>ssrA</i>                    | Real time PCR | ssrA-R1 AAGGCTTCTGTTGCCAGGYG<br>ssrA-F1 AGTTGCAAATGACAACTATGCGG<br>ssrA-P1 ACCCCGCTTAAACCTGCGACGGTT                                                         | 124                    | Mardosaitė-Busaitienė et al., 2019            |
| <i>16S-23S rRNA ITS region</i> | Nested PCR    | WITS-F ACCTCCTTTCTAAGGATGAT<br>WITS-R CTCTTTCTTCAGATGATGATCC                                                                                                | ~ 1200                 | Kaewmongkol et al., 2011                      |
|                                |               | Bh311–332F CTCTTTCTTCAGATGATGATCC<br>ITS-R GCGGTAAAGCTTCCAATCATA                                                                                            | ~ 800-1000             |                                               |
| <i>gltA</i>                    | Nested PCR    | gltA-F2 GCTTCGTGTGAATCGAAAATCA<br>gltA-R2 GCGGTAAAGCTTCCAATCATA                                                                                             | 379                    | Norman et al., 1995; Kaewmongkol et al., 2011 |
|                                |               | BhCS.1137n AATGCAAAAAGAACAGTAAACA                                                                                                                           |                        |                                               |

|                                           |                  |                                                                                                                                |          |                            |
|-------------------------------------------|------------------|--------------------------------------------------------------------------------------------------------------------------------|----------|----------------------------|
|                                           |                  | BhCS.781p GGGGACCAGCTCATGGTGG                                                                                                  |          |                            |
| <i>groEL</i>                              | Conventional PCR | BTNgroEL1 GAAGATGTGGAAGGTGAA<br>BTNgroEL2 TCACGGTCATAGTCAGAAG                                                                  | 336      | Kim et al., 2005           |
| <i>rpoB</i>                               | Conventional PCR | RpoB-F CGCATTGGYTTTCTTCGTATG<br>RpoB-R GTRGAYTGATTRGAACGYTG                                                                    | 863      | Kaewmongkol, 2012          |
| <b><i>Borrelia</i> spp.</b>               |                  |                                                                                                                                |          |                            |
| <i>23S rRNA</i>                           | Real time PCR    | Borrelia_Fp GCTTCAGCCTGGCCATAAATAG<br>Borrelia_R AGCGAGTCTTAAAAGGGCGATTTAGT<br>Borrelia_Z TCACTCGGSTTCGGGTCTACCACATCT FAM/BHQ1 | 77       | Sakalauskas et al., 2020   |
| <i>ospA</i>                               | Conventional PCR | SL-F AATAGGTCTAATAATAGCCTTAATAGC<br>SL-R CTAGTGTTTTGCCATCTTCTTTGAAAA                                                           | 307      | Demaerschalck et al., 1995 |
| 16S-23S <i>rrs-rrlA</i> intergenic spacer | Nested PCR       | IGS-1F GTATGTTTAGTGAGGGGGGTG<br>IGS-1R GGATCATAGCTCAGGTGGTTAG                                                                  | 400-1000 | Bunikis et al., 2004       |
|                                           |                  | IGS-2F AGGGGGGTGAAGTCGTAACAAG<br>IGS-2R GTCTGATAAACCTGAGGTCGGA                                                                 |          |                            |
| <i>fla</i>                                | Nested PCR       | 132f TGGTATGGGAGTTTCTGG<br>905r TCTGTCATTGTAGCATCTTT                                                                           | 774      | Wodecka et al., 2009       |
|                                           |                  | 220f CAGACAACAGAGGGGAAAT<br>824r TCAAGTCTATTTTGAAAGCACC                                                                        | 605      |                            |
| <b><i>Rickettsia</i> spp.</b>             |                  |                                                                                                                                |          |                            |
| <i>gltA</i>                               | Real time PCR    | Rick F1 TGCMGAYCATGAGCACAATGCTTC<br>Rick R1 CCCAAAGTGAKGCAATACCCGT<br>Rick P1 TGCCGGCTCATCYGGAGCTAACCC FAM/BHQ1                | 103      | Sakalauskas et al., 2020   |
| <i>gltA</i>                               | Nested PCR       | RpCS.877p GGGGACCTGCTCACGGCGG<br>RpCS.1258n ATTGCAAAAAGTACAGTGAACC                                                             | 381      | Mit'ková et al., 2015      |
|                                           |                  | RpCS.896p GGCTAATGAAGCAGTGATAA<br>RpCS.1233n GCGACGGTATACCCATAGC                                                               | 338      |                            |
| <b><i>Mycoplasma</i> spp.</b>             |                  |                                                                                                                                |          |                            |
| <i>16SrRNA</i>                            | Conventional PCR | 322s GCCCATATTCTACGGGAAGCAGCAGT<br>938as CTCCACCACTTGTTTCAGGTCCC CGTC                                                          | 600      | Varanat et al., 2011       |

## References

1. Bown, K.J.; Lambin, X.; Ogden, N.H.; Petrovec, M.; Shaw, S.E.; Woldehiwet, Z.; Birtles, R.J. High-resolution genetic fingerprinting of European strains of *Anaplasma phagocytophilum* by use of multilocus variable-number tandem-repeat analysis. *J. Clin. Microbiol.* **2007**, *45*, 1771–1776.
2. Bunikis, J.; Garpmo, U.; Tsao, J.; Berglund, J.; Fish, D.; Barbour, A. G. Sequence typing reveals extensive strain diversity of the Lyme borreliosis agents *Borrelia burgdorferi* in North America and *Borrelia afzelii* in Europe. *Microbiol.* **2004**, *150*, 1741–1755.

3. de la Fuente, J.; Massung, R.F.; Wong, S. J.; Chu, F. K.; Lutz, H.; Meli, M.; von Loewenich, F. D.; Grzeszczuk, A.; Torina, A.; Caracappa, S.; Mangold, A. J.; Naranjo, V.; Stuen, S.; Kocan, K. M. Sequence analysis of the msp4 gene of *Anaplasma phagocytophilum* strains. *J. Clin. Microbiol.* **2005**, *43*, 1309–1317.
4. Demaerschalck, I.; Ben Messaoud, A.; De Kesel, M.; Hoyois, B.; Lobet, Y.; Hoet, P.; Bigaignon, G.; Bollen, A.; Godfroid E. Simultaneous presence of different *Borrelia burgdorferi* genospecies in biological fluids of Lyme disease patients. *J. Clin. Microbiol.* **1995**, *33*, 602–608.
5. Ražanskė, I.; Rosef, O.; Radzijeuskaja, J.; Bratchikov, M.; Gričiuvienė, L.; Paulauskas, A. Prevalence and co-infection with tick-borne *Anaplasma phagocytophilum* and *Babesia* spp. in red deer (*Cervus elaphus*) and roe deer (*Capreolus capreolus*) in Southern Norway. *Int. J. Parasitol.* **2019**, *8*, 127–134.
6. Rar, V.A.; Epikhina, T.I.; Livanova, N.N.; Panov, V.V. Genetic diversity of *Babesia* in *Ixodes persulcatus* and small mammals from North Ural and West Siberia, Russia. *Parasitol.* **2011**, *138*, 175–182.
7. Mardosaitė-Busaitienė, D.; Radzijeuskaja, J.; Balčiauskas, L.; Bratchikov, M.; Jurgelevičius, V.; Paulauskas, A. Prevalence and diversity of *Bartonella* species in small rodents from coastal and continental areas. *Sci. Rep.* **2019**, *9*, 1–10.
8. Kaewmongkol, G.; Kaewmongkol, S.; Burmej, H.; Bennett, M.D.; Fleming, P.A.; Adams, P.J.; Wayne, A.F.; Ryan, U.; Irwin, P.J.; Fenwick, S.G. Diversity of *Bartonella* species detected in arthropod vectors from animals in Australia. *Comp. Immunol. Microbiol. Infect. Dis.* **2011**, *34*, 411–417.
9. Kaewmongkol, G. Detection and characterization of *Bartonella* species in Western Australia. Ph.D. Thesis; Murdoch University, Perth, Australia, 2012.
10. Kim, C.M.; Kim, J.Y.; Yi, Y.H.; Lee, M.J.; Cho, M.R.; Shah, D.H.; Klein, T.A.; Kim, H.C.; Song, J.W.; Chong, S.T.; O'Guinn, M.L.; Lee, J.S.; Lee, I.Y.; Park, J.H.; Chae, J.S. Detection of *Bartonella* species from ticks, mites and small mammals in Korea. *J. Vet. Sci.* **2005**, *6*, 327–334.
11. Liz, J.S.; Sumner, J.W.; Pfister, K.; Brossard, M. PCR detection and serological evidence of granulocytic ehrlichial infection in roe deer (*Capreolus capreolus*) and chamois (*Rupicapra rupicapra*). *J Clin Microbiol.* **2002**, *40*, 892–897.
12. Massung, R.F.; Slater, K.; Owens, J.H.; Nicholson, W.L.; Mather, T.N.; Solberg, V.B.; Olson, J.G. Nested PCR assay for detection of granulocytic ehrlichiae. *J. Clin. Microbiol.* **1998**, *36*, 1090–1095.
13. Mit'ková, K.; Berthová, L.; Kalúz, S.; Kazimírová, M.; Burdová, L.; Kocianová, E. First detections of *Rickettsia helvetica* and *R. monacensis* in ectoparasitic mites (*Laelapidae* and *Trombiculidae*) infesting rodents in south-western Slovakia. *Parasitol. Res.* **2015**, *114*, 2465–2472.
14. Norman, A.F.; Regnery, R.; Jameson, P.; Greene, C.; Krause, D.C. Differentiation of *Bartonella*-like isolates at the species level by PCR-restriction fragment length polymorphism in the citrate synthase gene. *J Clin Microbiol.* **1995**, *33*, 1797–1803.
15. Sakalauskas, P.; Lipatova, I.; Radzijeuskaja, J.; Paulauskas, A. Pathogen screening in the red fox (*Vulpes vulpes*) from Lithuania. *Biologija*, **2020**, *65*, 283–295.
16. Sumner, J.W.; Nicholson, W.L.; Massung, R.F. PCR amplification and comparison of nucleotide sequences from the *groESL* heat shock operon of *Ehrlichia* species. *J. Clin. Microbiol.* **1997**, *35*, 2087–2092.
17. Varanat, M.; Maggi, R. G.; Linder, K. E.; Breitschwerdt, E. B. Molecular prevalence of *Bartonella*, *Babesia*, and hemotropic *Mycoplasma* sp. in dogs with splenic disease. *J. Vet. Intern. Med.* **2011**, *25*, 1284–1291.
18. Wodecka B.; Rymaszewska A.; Sawczuk M.; Skotarczak B. Detectability of tick borne agents DNA in the blood of dogs, undergoing treatment for borreliosis. *Ann. Agric. Environ. Med.* **2009**, *16*, 914.
