# Supplementary material
Source: MDPI journal article supplement (https://www.mdpi.com/1424-2818/16/4/192)
Supplement: s1 [file s1 › Table_S2.pdf]

Table S2: Detailed PCR protocols for *Bartonella* spp. detection.

| Target                                           | 1 step PCR                                                                                                                                                    | 2 step PCR                                                                                                                                                            | 1 <sup>st</sup> PCR amplification steps                                               | 2 <sup>nd</sup> PCR amplification steps                                        |
|--------------------------------------------------|---------------------------------------------------------------------------------------------------------------------------------------------------------------|-----------------------------------------------------------------------------------------------------------------------------------------------------------------------|---------------------------------------------------------------------------------------|--------------------------------------------------------------------------------|
| <i>ssrA</i> <sup>a</sup>                         | 1X SensiMix™ II Probe<br>0.2 µM ssrA-F1 Primer<br>0.2 µM ssrA-R1 Primer<br>0.1 µM ssrA-P1 Probe<br>100 ng DNA                                                 |                                                                                                                                                                       | 95°C – 10 min<br>95°C – 20 s<br>50 X 50°C – 1 min<br>72°C – 10 s                      |                                                                                |
| <i>16 S–23 S rRNA</i><br>ITS region <sup>c</sup> | 1X Taq Buffer with KCl<br>2.5 mM MgCl <sub>2</sub><br>0.2 mM dNTP Mix<br>1.5U Taq DNA Polymerase<br>0.4 µM WITS-F primer<br>0.4 µM WITS-R primer<br>200ng DNA | 1X Taq Buffer with KCl<br>2 mM MgCl <sub>2</sub><br>0.2 mM dNTP Mix<br>1.5U Taq DNA Polymerase<br>0.4 µM Bh311-332F primer<br>0.4 µM ITS-R primer<br>1 µl PCR product | 96°C - 2 min<br>94°C - 50 s<br>40 X 48°C - 50 s<br>72°C - 1 min 30 s<br>72°C - 10 min | 96°C - 2 min<br>94°C - 45 s<br>45 X 60°C - 30 s<br>72°C - 45 s<br>72°C - 5 min |
| <i>gltA</i> <sup>b</sup>                         | 1X DreamTaq Green PCR MM<br>0.4 µM gltA-F2 primer<br>0.4 µM gltA-R2 primer<br>200 ng DNA                                                                      | 1X DreamTaq Green PCR MM<br>0.4 µM BhCS.781p primer<br>0.4 µM BhCS.1137n primer<br>1 µl PCR product                                                                   | 95°C – 5 min<br>95°C – 50 s<br>40 X 48°C – 1 min<br>72°C – 90 s<br>72°C – 5 min       | 95°C – 5 min<br>95°C – 45 s<br>40 X 55°C – 30 s<br>72°C – 45 s<br>72°C – 5 min |
| <i>rpoB</i> <sup>b</sup>                         | 1X DreamTaq Green PCR MM<br>0.8 µM 1400F primer<br>0.8 µM 2300R primer<br>200 ng DNA                                                                          |                                                                                                                                                                       | 96°C - 2 min<br>94°C - 50 s<br>45 X 55°C - 50 s<br>72°C - 1 min<br>72°C - 5 min       |                                                                                |
| <i>groEL</i>                                     | 1X Dream Taq Green buffer<br>0.2 mM dNTP Mix<br>1U Taq DNA Polymerase<br>0.4 µM BTNgroEL1 primer<br>0.4 µM BTNgroEL2 primer<br>200 ng DNA                     |                                                                                                                                                                       | 95°C – 5 min<br>95°C – 1 min<br>35 X 55°C – 1 min<br>72°C – 1 min<br>72°C – 5 min     |                                                                                |

<sup>a</sup> Real time PCR

<sup>b</sup> Conventional PCR

<sup>c</sup> Nested PCR
