# Supplementary material
Source: MDPI journal article supplement (https://www.mdpi.com/1424-2818/16/4/192)
Supplement: s1 [file s1 › Table_S4.pdf]

Table S4: Variable nucleotide positions of COI gene fragments in studied bat flea species

[illegible]
